# Supplementary material for: RNAi-based knockdown of candidate gut receptor genes altered the susceptibility of Spodoptera frugiperda and S. litura larvae to a chimeric toxin Cry1AcF
Source: PeerJ. 2023 Jan 24;11:e14716. doi: 10.7717/peerj.14716 (PMC9881468; doi:10.7717/peerj.14716)
Supplement: Supplemental Information 10 [file peerj-11-14716-s010.xlsx]

## Sheet: Sheet1
				S. frugi
			0	25	50	100	150	200
		PBS	100	100	100	100	100	100		0	0	0	0	0	0
		Cry1AcF	100	65	35	19	0	0		0	7	8	4	0	0
		TcaB	100	79	45	28	11	0		0	9	10	6	4	0

## Sheet: Sheet2
				S. litura
			0	25	50	100	150	200
		PBS	100	100	100	100	100	100		0	0	0	0	0	0
		Cry1AcF	100	72	40	22	0	0		0	7	8	4	0	0
		TcaB	100	88	62	41	22	5		0	9	10	7	6	4

## Sheet: Sheet3
				S. frugiperda
		CAD	H	FB	FG	MG	HG	MT
			1	1.5	4	13	8	3
			0.2	0.2	0.5	2	1.5	1
		ABCC2	H	FB	FG	MG	HG	MT
			1	4	3	8	6	4.5
			0.2	1	0.5	1.9	0.9	1
		ALP1	H	FB	FG	MG	HG	MT
			1	0.8	3	7	3.5	2.5
			0.2	0.1	0.5	0.7	1	0.5
		APN	H	FB	FG	MG	HG	MT
			1	1.2	2.5	5.5	2.8	3
			0.1	0.2	0.3	1	0.5	0.5
	CAD

## Sheet: Sheet11
				S. litura
		CAD	H	FB	FG	MG	HG	MT
			1	2	5	10	4	3.5
			0.2	0.2	0.5	1	0.6	0.3
		ABCC2	H	FB	FG	MG	HG	MT
			1	2.5	4	8	7.4	5
			0.1	0.3	0.5	1.1	1	0.8
		ALP1	H	FB	FG	MG	HG	MT
			1	1.5	2.9	5.5	4	2
			0.2	0.2	0.6	1	0.8	0.5
		APN	H	FB	FG	MG	HG	MT
			1	1	3	6	3.5	2.8
			0.1	0.2	0.4	0.9	0.5	0.4
	CAD

## Sheet: Sheet4
	S. frugiperda
			1st	2nd	3rd	4th	5th
	CAD		1	2.5	4	7	6.1
			0.2	0.25	0.2	1.5	1
			1st	2nd	3rd	4th	5th
	ABCC2		1	2	2.5	6	6.5
			0.15	0.2	0.3	1	0.9
			1st	2nd	3rd	4th	5th
	ALP1		1	1.5	3.2	7	6.5
			0.19	0.15	0.3	1	0.9
			1st	2nd	3rd	4th	5th
	APN		1	1.7	2.5	5	5.9
			0.1	0.2	0.25	0.5	0.6

## Sheet: Sheet12
	S. litura
			1st	2nd	3rd	4th	5th
	CAD		1	3	5	7	8
			0.2	0.3	0.5	1	1
			1st	2nd	3rd	4th	5th
	ABCC2		1	3	5	8.5	8
			0.15	0.3	0.5	1.5	0.9
			1st	2nd	3rd	4th	5th
	ALP1		1	1	4	6	4.5
			0.1	0.15	0.4	0.9	0.6
			1st	2nd	3rd	4th	5th
	APN		1	2	2.5	5	5.5
			0.1	0.2	0.25	0.5	0.6

## Sheet: Sheet5
		PBS	GFPsi	CADsi	ALP1si	APNsi	ABCC2si										S. frugiperda
CAD		1	0.96	0.25	0.89	0.94	0.92
		0.03	0.04	0.05	0.07	0.06	0.05
		PBS	GFPsi	CADsi	ALP1si	APNsi	ABCC2si
ALP1		1	0.98	0.93	0.29	0.97	0.91
		0.02	0.03	0.03	0.05	0.04	0.03
		PBS	GFPsi	CADsi	ALP1si	APNsi	ABCC2si
APN		1	0.99	0.92	0.96	0.35	0.95
		0.03	0.03	0.03	0.05	0.04	0.04
		PBS	GFPsi	CADsi	ALP1si	APNsi	ABCC2si
ABCC2		1	1	0.95	0.94	0.92	0.39
		0.02	0.02	0.05	0.04	0.04	0.05

## Sheet: Sheet13
		PBS	GFPsi	CADsi	ALP1si	APNsi	ABCC2si										S. litura
CAD		1	1	0.24	0.92	0.99	0.95
		0.02	0.02	0.04	0.06	0.05	0.07
		PBS	GFPsi	CADsi	ALP1si	APNsi	ABCC2si
ALP1		1	1	0.89	0.32	0.98	0.9
		0.03	0.02	0.04	0.05	0.07	0.05
		PBS	GFPsi	CADsi	ALP1si	APNsi	ABCC2si
APN		1	0.97	0.88	0.92	0.28	0.91
		0.03	0.03	0.05	0.07	0.04	0.06
		PBS	GFPsi	CADsi	ALP1si	APNsi	ABCC2si
ABCC2		1	0.95	0.94	0.88	0.91	0.42
		0.02	0.02	0.05	0.04	0.04	0.06

## Sheet: Sheet6
			PBS	GFPsi	CADsi	ALP1si	APNsi	ABCC2si					S. frugiperda
		Cry1AcF (30 ng/larva)	53	55	46	30	27	50
		Cry1AcF (100 ng/larva)	91	90	82	52	49	88
			4	5	4.5	3	2.8	5
			7	6	7.5	5	4.9	10
			PBS	GFPsi	CADsi	ALP1si	APNsi	ABCC2si					S. litura
		Cry1AcF (40 ng/larva)	56	52	25	48	51	40
		Cry1AcF (120 ng/larva)	95	92	45	86	87	75
			4	5	4.5	3	2.8	5
			7	6	7.5	5	4.9	10

## Sheet: Sheet7
				PBS	GFPsi	CADsi	ALP1si	APNsi	ABCC2si
			% pupation	95	97	92	93	91	92					S. frugiperda
			% adult emergence	94	96	91	90	89	88
				2	3	4	3	4	5
				3	4	5	5	4	4
				PBS	GFPsi	CADsi	ALP1si	APNsi	ABCC2si
			% pupation	100	100	94	92	90	95
			% adult emergence	98	97	90	89	88	91
				0	0	4	5	6	3					S. litura
				2	3	5	7	8	6

[truncated: 3 more sheets: Sheet8, Sheet9, Sheet10]
