# Supplementary material for: RNAi-based knockdown of candidate gut receptor genes altered the susceptibility of Spodoptera frugiperda and S. litura larvae to a chimeric toxin Cry1AcF
Source: PeerJ journal article supplement (doi:10.7717/peerj.14716), 2023-01-24

**Supplementary Figure 3.** Stage-specific expression patterns of Cry receptor encoding genes in different life stages of *S. litura*. Fold change in expression of a candidate gene in different developmental (second-, third-, fourth- and fifth-instar) stages was quantified in relation to the gene's expression in first-instar stage (value set at 1). Significant differential expression is indicated by different letters ( $P < 0.01$ , Tukey's HSD test). *S. litura* *GAPDH* gene was used as the internal reference. Each bar represents the mean fold change value  $\pm$  SE of qPCR runs in five biological and three technical replicates.

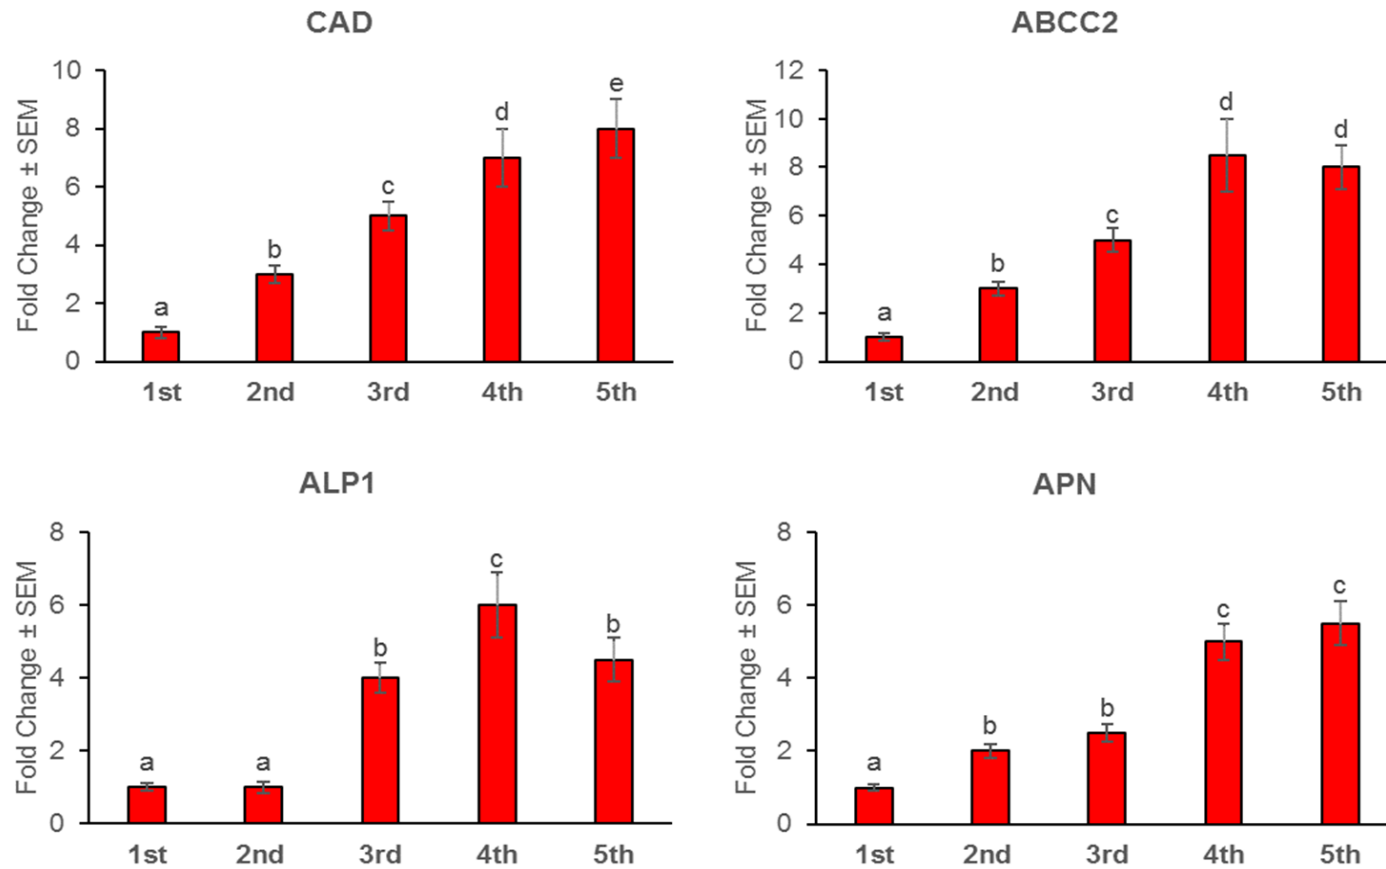

Supplement: supplementary_figure_3.pdf [file supplementary_figure_3.pdf]
