# Supplementary material for: RNAi-based knockdown of candidate gut receptor genes altered the susceptibility of Spodoptera frugiperda and S. litura larvae to a chimeric toxin Cry1AcF
Source: PeerJ journal article supplement (doi:10.7717/peerj.14716), 2023-01-24

**Supplementary Figure 5.** RT-qPCR-based detection of transcripts corresponding to CAD, ALP1, APN and ABCC2 receptor encoding genes in *S. frugiperda* fourth-instar larvae silenced (si) with different target genes. Larvae were orally ingested with dsRNA-expressing *E. coli* HT115 cells and inoculated for 24 h. Larvae force fed with GFP dsRNA and PBS were used as the non-native and negative control, respectively. Gene expression was normalized using *rps3* gene of *S. frugiperda*. Each bar represents the mean fold change value with standard error of RT-qPCR runs in five biological and three technical replicates. Treatments with different letters are significantly different at  $P < 0.01$ , Tukey's HSD test.

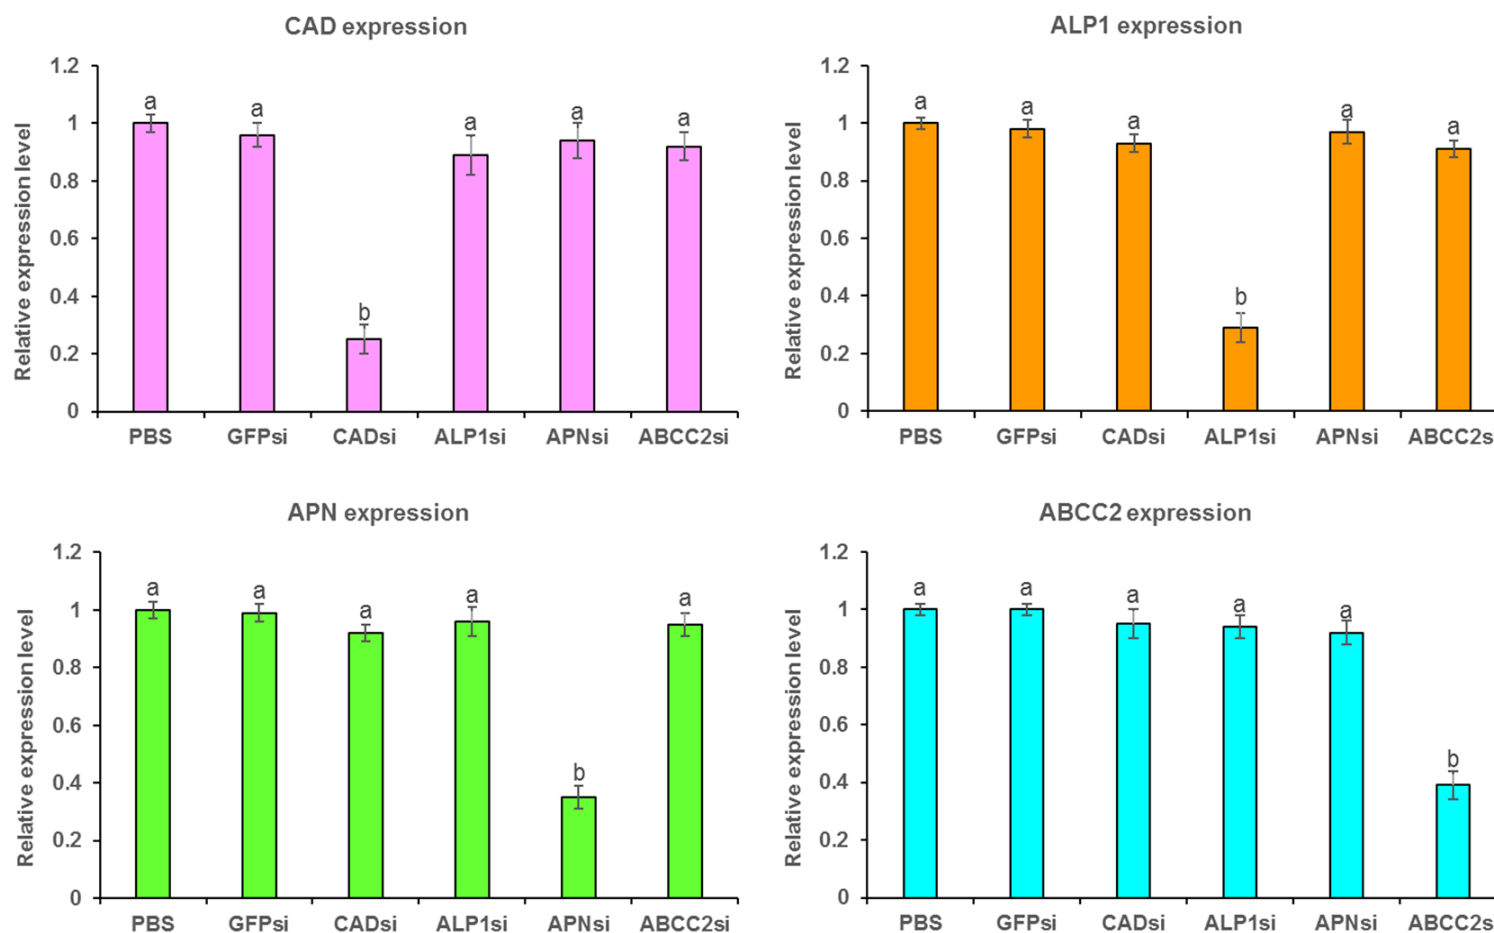

Supplement: supplementary_figure_5.pdf [file supplementary_figure_5.pdf]
