# Supplementary material for: RNAi-based knockdown of candidate gut receptor genes altered the susceptibility of Spodoptera frugiperda and S. litura larvae to a chimeric toxin Cry1AcF
Source: PeerJ journal article supplement (doi:10.7717/peerj.14716), 2023-01-24

**Supplementary Figure 7.** Percent pupation and adult emergence data of dsRNA-fed *S. frugiperda* (A) and *S. litura* (B) insects during 7-10 days after inoculation. Each bar with identical letter indicates no significant difference between treatments ( $P > 0.01$ ,  $n = 30$ ).

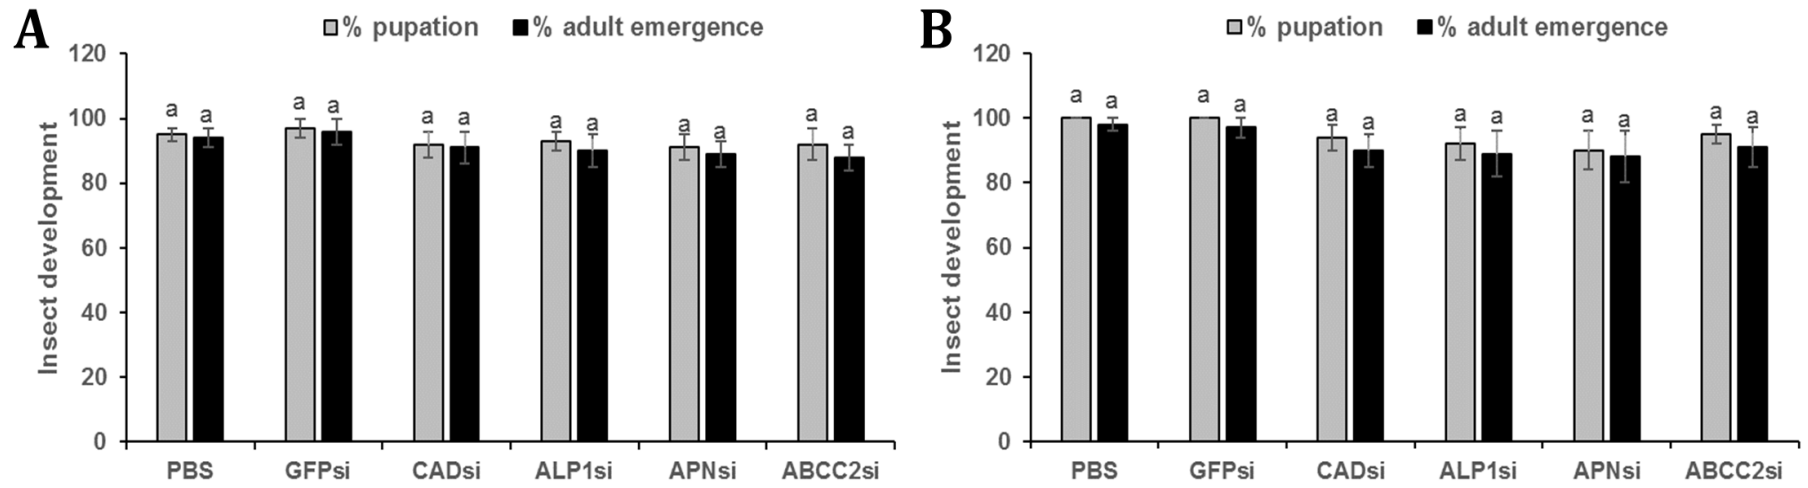

Supplement: supplementary_figure_7.pdf [file supplementary_figure_7.pdf]
